# Supplementary material for: Filling carbon nanotubes with magnetic particles
Source: Royal Society of Chemistry journal article supplement (doi:10.1039/c3tc30119b), 2013-01-01
Supplement: c3tc30119b.pdf [file c3tc30119b.pdf]

Supplementary Material to the Manuscript “Filling the carbon nanotubes with magnetic particles”

by the S. Kopyl *et al.*

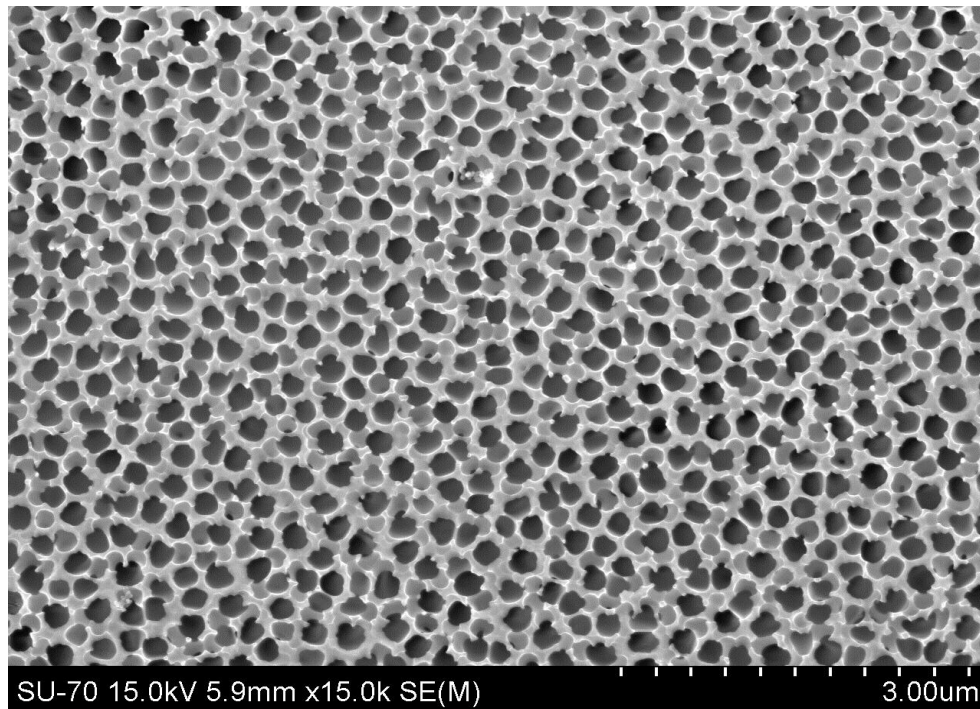

Figure S1. SEM micrograph of the alumina ( $\text{Al}_2\text{O}_3$ ) membrane.

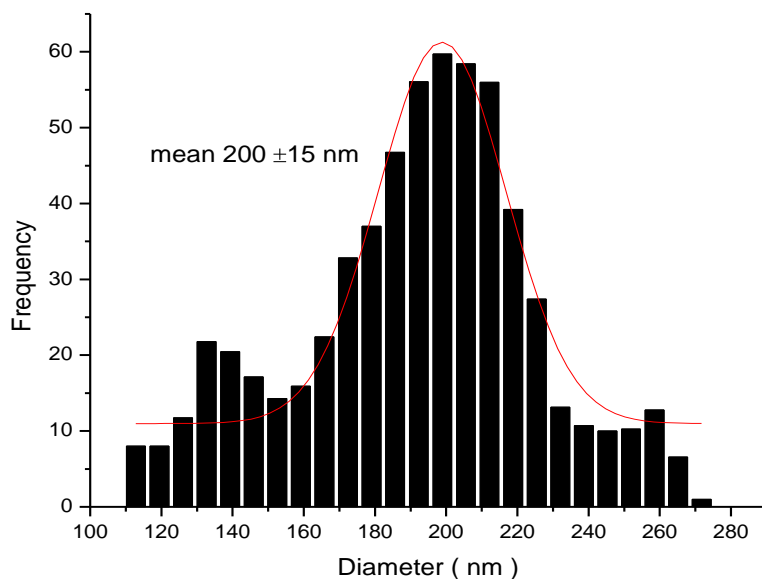

Figure S2. Pore size distribution for the alumina ( $\text{Al}_2\text{O}_3$ ) membrane calculated from SEM image analysis.

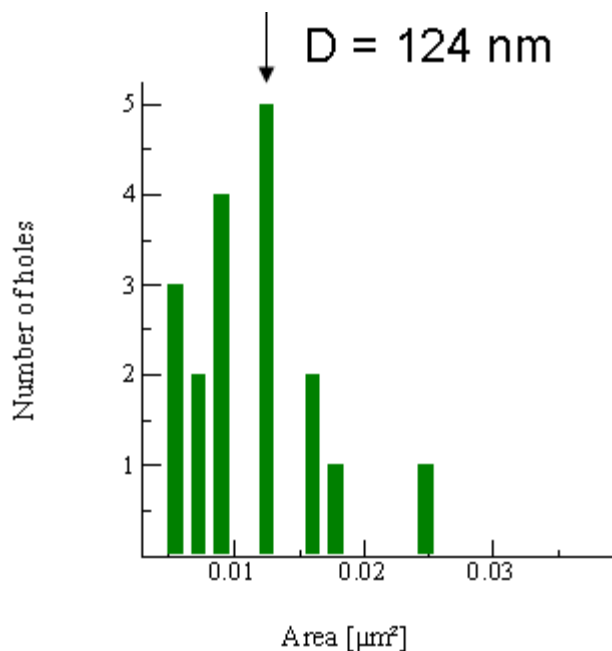

Figure S3. Pore size distribution for the alumina ( $\text{Al}_2\text{O}_3$ ) membrane with carbon nanotubes calculated from AFM image analysis.

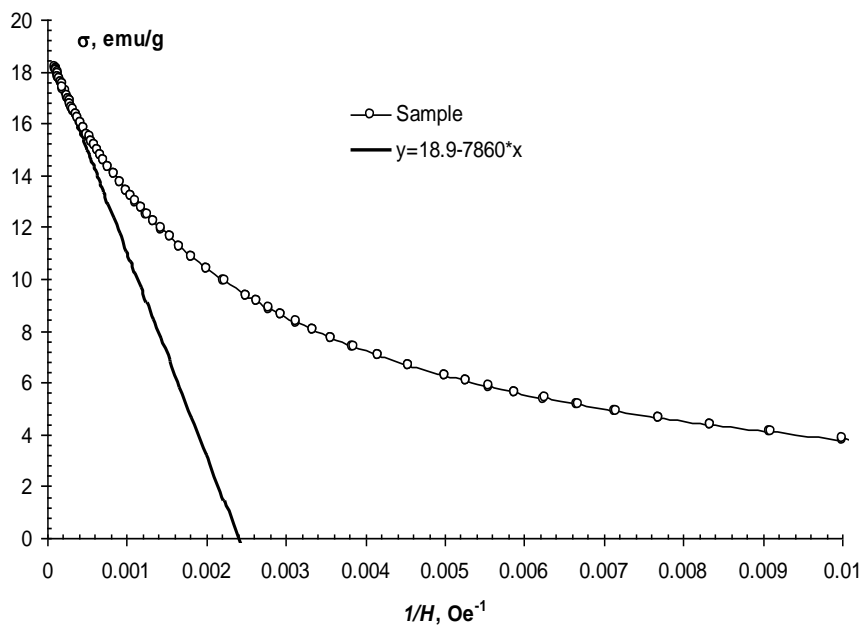

Figure S4. Magnetization curve of CNTs filled with  $\text{Fe}_3\text{O}_4$  in the coordinates  $M - 1/H$ .

The concentration the nanoparticles in the sample,  $n_{\text{np}}$  and the magnetic moment of a nanoparticle  $\mu_{\text{np}}$  were estimated after approximating the experimental dependence of the magnetization ( $y=M$ ,  $x=1/H$ ) by a straight line at high magnetic field.
